# Supplementary material for: Luminescent single molecule magnets of a series of β-diketone dysprosium complexes
Source: Royal Society of Chemistry journal article supplement (doi:10.1039/c5ra17358b), 2015-01-01
Supplement: c5ra17358b1.pdf [file c5ra17358b1.pdf]

Electronic Supplementary Information

# Luminescent single molecule magnets of a series of $\beta$ -diketone dysprosium complexes

Wenyi Chu, Qingyan Sun, Xu Yao, Pengfei Yan, Guanghui An, Guangming Li\*

*Key Laboratory of Functional Inorganic Material Chemistry (MOE), School of Chemistry and Materials Science, Heilongjiang University, No. 74, Xuefu Road, Nangang District, Harbin, Heilongjiang 150080, P. R. China, E-mail: gmli\_2000@163.com. Fax: (+86)451-86608458; Tel: (+86) 451-86608458*

|            |                                                                                                                                                                                                                                                             |
|------------|-------------------------------------------------------------------------------------------------------------------------------------------------------------------------------------------------------------------------------------------------------------|
| Scheme S1  | Synthesis of complexes <b>1–3</b> .                                                                                                                                                                                                                         |
| Fig. S1    | IR spectra of tfa and complexes <b>1–3</b> .                                                                                                                                                                                                                |
| Fig. S2    | UV-vis absorption spectra of tfa and complexes <b>1–3</b> in CH <sub>3</sub> OH (10 <sup>-5</sup> mol/L)                                                                                                                                                    |
| Fig. S3–5  | TG–DSC curves of complexes <b>1–3</b> .                                                                                                                                                                                                                     |
| Fig. S6–8  | The powder X-ray diffraction spectra of the simulated patterns and experimental for complexes <b>1–3</b> .                                                                                                                                                  |
| Fig. S9–11 | The inter molecule $\pi$ – $\pi$ stacking and hydrogen bonds interactions in complexes <b>1–3</b> .                                                                                                                                                         |
| Fig. S12   | M versus H / T plots at 1.8–8K for complexes <b>1–3</b> .                                                                                                                                                                                                   |
| Fig. S13   | Temperature dependence of the in-phase ( $\chi'$ ) and out-of-phase ( $\chi''$ ) ac susceptibility of complexes <b>1</b> (left), <b>2</b> (middle) and <b>3</b> (right), respectively, under zero dc field.                                                 |
| Fig. S14   | Temperature dependence of the in-phase ( $\chi'$ ) and out-of-phase ( $\chi''$ ) ac susceptibility of complexes <b>1</b> (left), <b>2</b> (middle) and <b>3</b> (right) under 2000 Oe in the frequency range 10–1000 Hz in the temperature range of 2–18 K. |
| Fig. S15   | Field dependence of the characteristic frequency as a function of the applied dc field for complexes <b>1</b> (a), <b>2</b> (b) and <b>3</b> (c) at 6 K.                                                                                                    |
| Fig. S16   | Fitted broadness parameters $\alpha_{\text{Cole}}$ as functions of temperature for complexes <b>1–3</b> .                                                                                                                                                   |
| Fig. S17   | Hysteresis loops for complexes <b>1</b> (left) and <b>2</b> (right) with different sweep rate at 1.8K.                                                                                                                                                      |
| Fig. S18   | Emission spectra of complexes <b>1–3</b> in the MeOH at 298 K (10 <sup>-5</sup> mol/L, $\lambda_{\text{ex}} = 335$ nm)                                                                                                                                      |
| Fig. S19   | Luminescence decay profiles of complexes <b>1</b> (left), <b>2</b> (middle) and <b>3</b> (right)                                                                                                                                                            |
| Table S1   | Fitted parameters of the Cole-Cole plots for complex <b>1</b> at $H_{\text{dc}} = 0$ G.                                                                                                                                                                     |
| Table S2   | Fitted parameters of the Cole-Cole plots for complex <b>2</b> at $H_{\text{dc}} = 0$ G.                                                                                                                                                                     |
| Table S3   | Fitted parameters of the Cole-Cole plots for complex <b>3</b> at $H_{\text{dc}} = 0$ G.                                                                                                                                                                     |

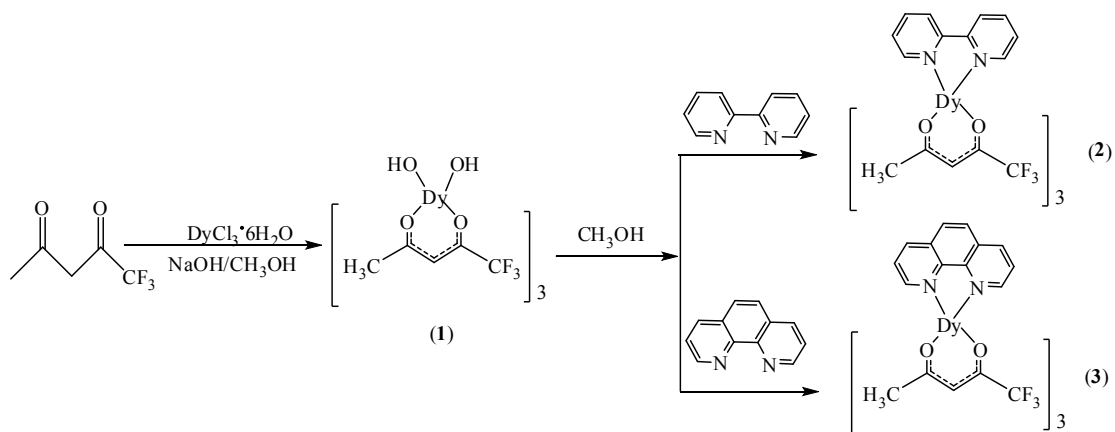

Scheme S1 Synthesis of complexes 1–3.

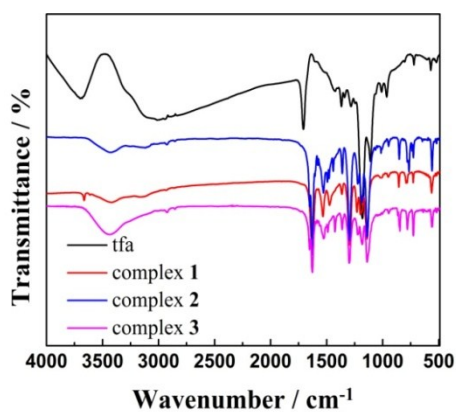

Fig. S1 IR spectra of tfa and complexes 1–3.

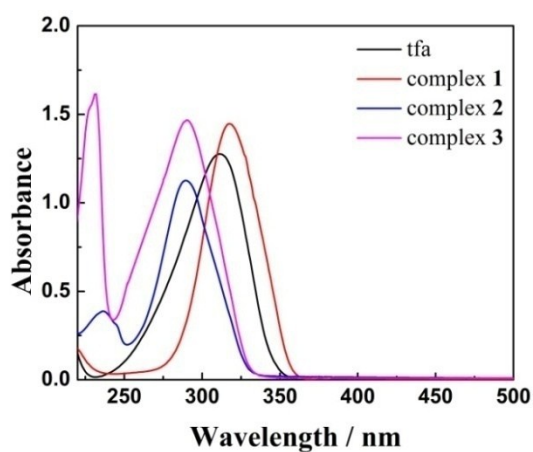

Fig. S2 UV-vis absorption spectra of tfa and complexes 1–3 in CH<sub>3</sub>OH (10<sup>-5</sup> mol/L).

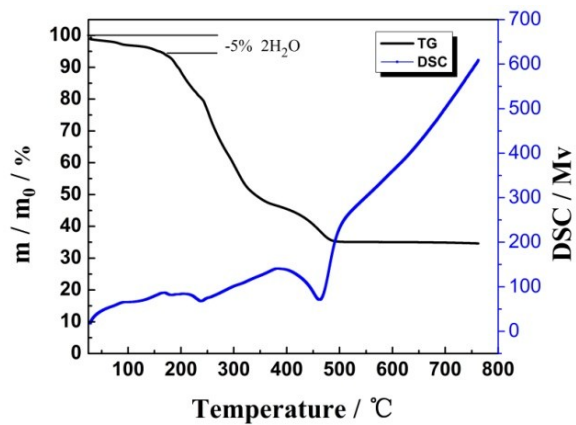

Fig. S3 TG–DSC curves of complex 1.

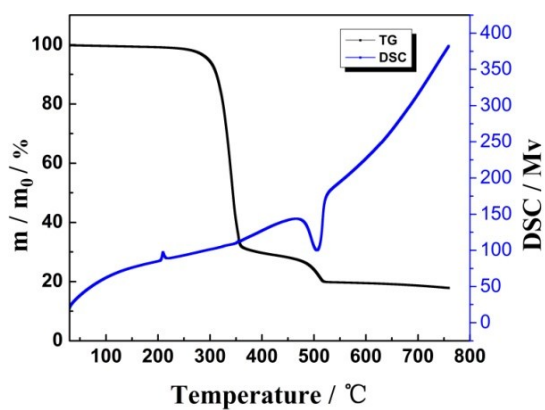

Fig. S4 TG–DSC curves of complex 2.

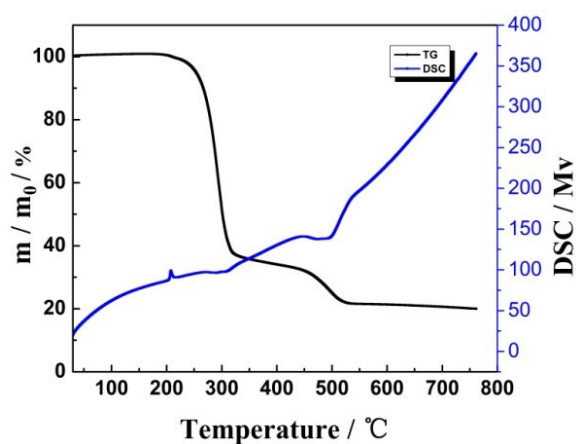

Fig. S5 TG–DSC curves of complex 3.

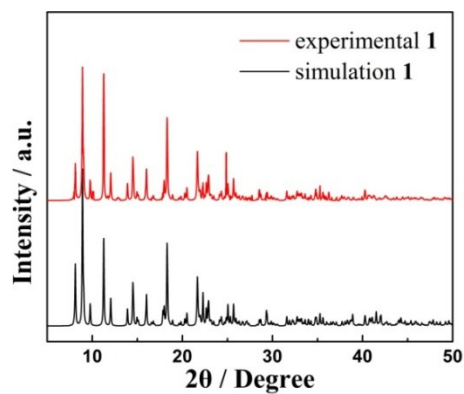

Fig. S6 The powder X-ray diffraction spectra of the simulated patterns and experimental for complex 1.

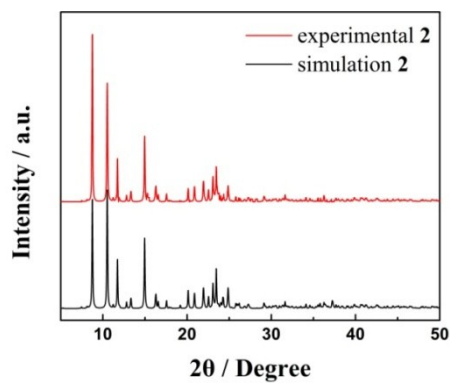

Fig. S7 The powder X-ray diffraction spectra of the simulated patterns and experimental for complex 2.

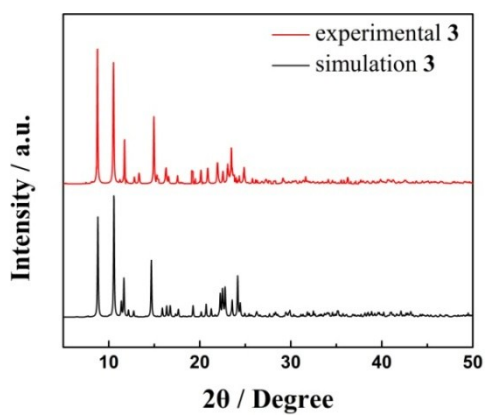

Fig. S8 The powder X-ray diffraction spectra of the simulated patterns and experimental for complex 3.

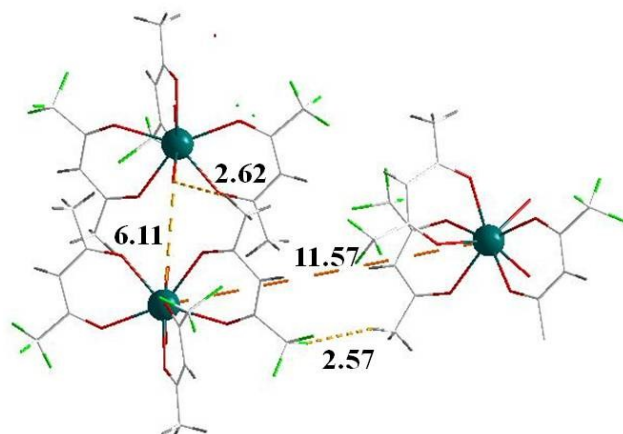

Fig. S9 The inter molecule hydrogen bonds interaction in complex **1**.

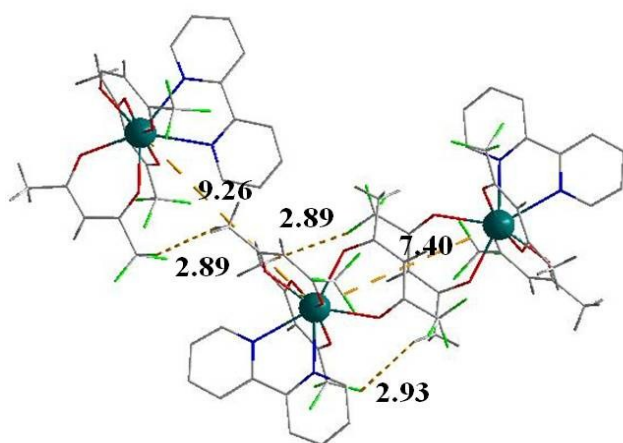

Fig. S10 The inter molecule hydrogen bonds interaction in complex **2**.

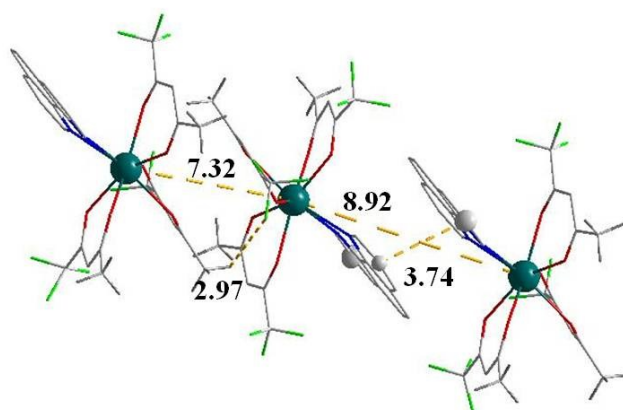

Fig. S11 The inter molecule  $\pi$ - $\pi$  stacking and hydrogen bonds interactions in complex **3**

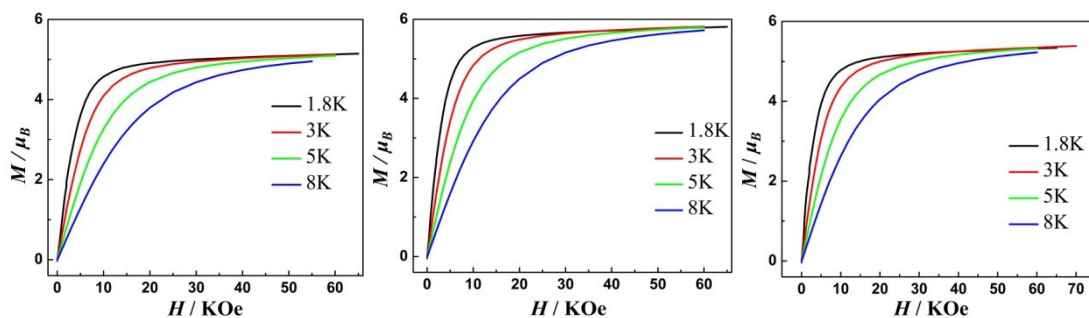

Fig. S12 M versus H / T plots at 1.8–8K for **1** (left), **2** (middle) and **3** (right).

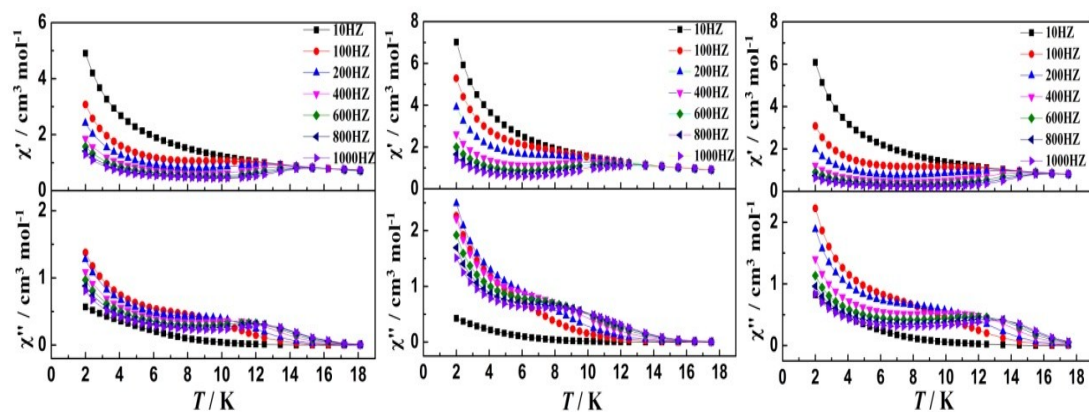

Fig. S13 Temperature dependence of the in-phase ( $\chi'$ ) and out-of-phase ( $\chi''$ ) ac susceptibility of complexes **1** (left), **2** (middle) and **3** (right), respectively, under zero dc field.

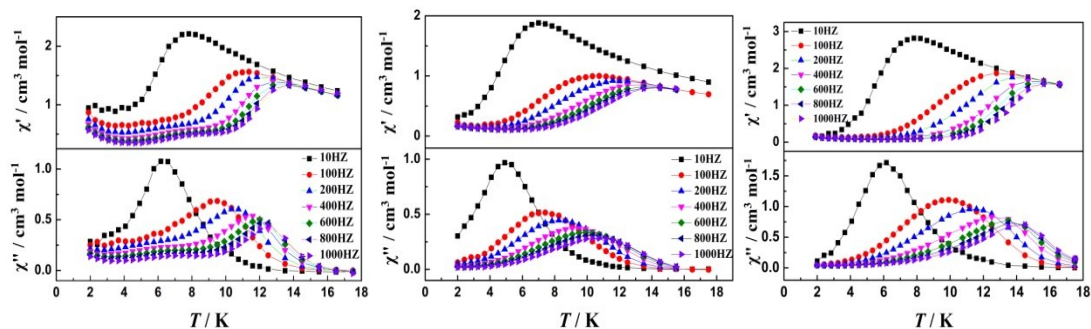

Fig. S14 Temperature dependence of the in-phase ( $\chi'$ ) and out-of-phase ( $\chi''$ ) ac susceptibility of complexes **1** (left), **2** (middle) and **3** (right) under 2000 Oe in the frequency range 10–1000 Hz in the temperature range of 2–18 K.

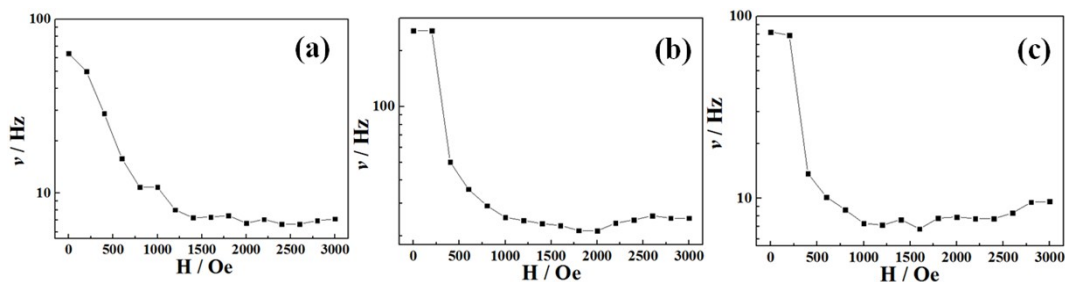

Fig. S15 Field dependence of the characteristic frequency as a function of the applied dc field for complexes **1** (a), **2** (b) and **3** (c) at 6 K.

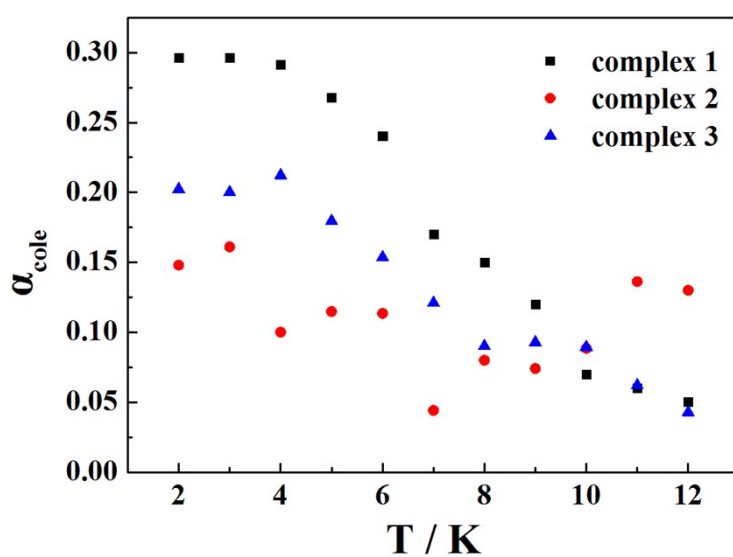

Fig. S16 Fitted broadness parameters  $\alpha_{\text{Cole}}$  as functions of temperature for complexes **1–3**.

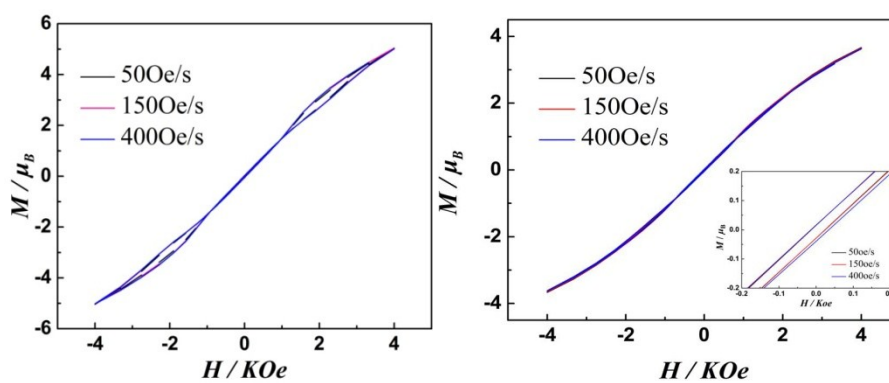

Fig. S17 Hysteresis loops for complexes **1** (left) and **2**(right) with different sweep rate at 1.8K.

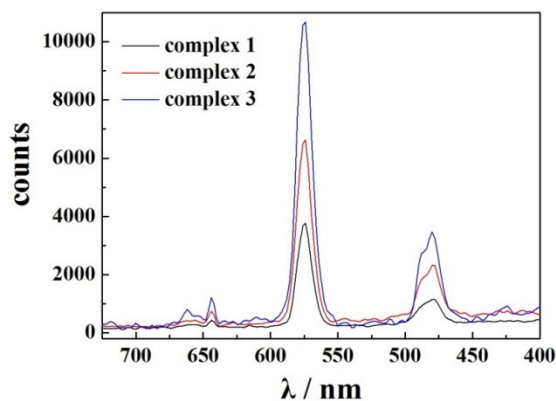

Fig. S18 Emission spectra of complexes **1–3** in the MeOH at 298 K ( $10^{-5}$ mol/L,  $\lambda_{\text{ex}} = 335$  nm).

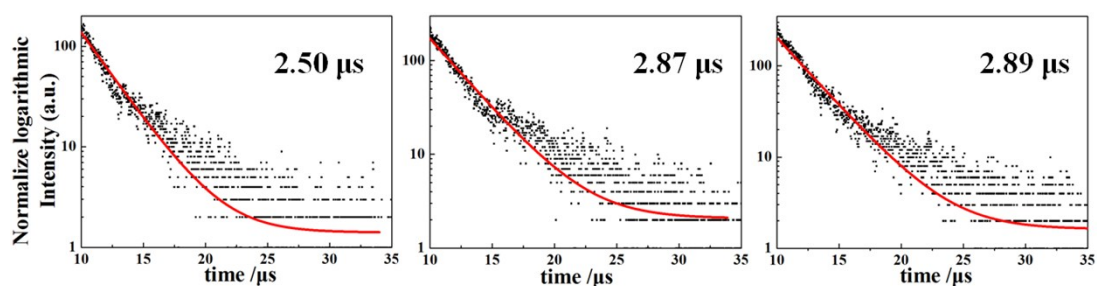

Fig. S19 Luminescence decay profiles of complexes **1** (left), **2** (middle) and **3** (right).

Table S1 Fitted parameters of the Cole-Cole plots for complex **1** at  $H_{\text{dc}} = 0$  G

| T / K | $\chi_S$ | $\chi_T$ | $\tau$  | $\alpha$ |
|-------|----------|----------|---------|----------|
| 2.0   | 0.79821  | 7.90872  | 0.00155 | 0.29636  |
| 3.0   | 0.75419  | 5.74441  | 0.00197 | 0.29624  |
| 4.0   | 0.69267  | 4.52013  | 0.00219 | 0.29153  |
| 5.0   | 0.66000  | 3.71539  | 0.00221 | 0.26785  |
| 6.0   | 0.65997  | 3.18482  | 0.00218 | 0.24052  |
| 7.0   | 0.69400  | 2.75010  | 0.00188 | 0.17000  |
| 8.0   | 0.63711  | 2.44511  | 0.00148 | 0.15000  |
| 9.0   | 0.59284  | 2.18547  | 0.00108 | 0.12010  |
| 10.0  | 0.59010  | 1.95748  | 0.00068 | 0.07014  |
| 11.0  | 0.58636  | 1.80580  | 0.00048 | 0.06018  |
| 12.0  | 0.59104  | 1.65125  | 0.00024 | 0.05027  |



Table S2 Fitted parameters of the Cole-Cole plots for complex **2** at  $H_{dc}=0$  G

| T / K | $\chi_s$ | $\chi_T$ | $\tau$  | $\alpha$ |
|-------|----------|----------|---------|----------|
| 2.0   | 2.52114  | 22.88511 | 0.00088 | 0.14803  |
| 3.0   | 1.46861  | 15.78451 | 0.00088 | 0.16102  |
| 4.0   | 1.99000  | 11.96630 | 0.00090 | 0.10010  |
| 5.0   | 1.54881  | 9.78260  | 0.00088 | 0.11484  |
| 6.0   | 1.56316  | 9.78074  | 0.00088 | 0.11350  |
| 7.0   | 2.09338  | 7.13911  | 0.00078 | 0.04412  |
| 8.0   | 2.49001  | 6.36585  | 0.00078 | 0.08001  |
| 9.0   | 2.84570  | 5.67926  | 0.00078 | 0.07403  |
| 10.0  | 3.16416  | 5.13107  | 0.00078 | 0.08847  |
| 11.0  | 3.34749  | 4.65563  | 0.00078 | 0.13618  |
| 12.0  | 3.46098  | 4.24383  | 0.00078 | 0.13000  |

Table S3 Fitted parameters of the Cole-Cole plots for complex **3** at  $H_{dc}=0$  G

| T / K | $\chi_s$ | $\chi_T$ | $\tau$  | $\alpha$ |
|-------|----------|----------|---------|----------|
| 2.0   | 0.24373  | 6.50042  | 0.00198 | 0.20235  |
| 3.0   | 0.19978  | 4.50003  | 0.00208 | 0.20011  |
| 4.0   | 0.15009  | 3.50000  | 0.00211 | 0.21229  |
| 5.0   | 0.11294  | 2.73849  | 0.00178 | 0.17964  |
| 6.0   | 0.12418  | 2.29602  | 0.00159 | 0.15367  |
| 7.0   | 0.18369  | 1.99358  | 0.00148 | 0.12102  |
| 8.0   | 0.19346  | 1.74521  | 0.00118 | 0.09009  |
| 9.0   | 0.09045  | 1.03579  | 0.00088 | 0.09285  |
| 10.0  | 0.09305  | 1.40321  | 0.00068 | 0.08947  |
| 11.0  | 0.12382  | 1.27521  | 0.00053 | 0.06212  |
| 12.0  | 0.16079  | 1.17750  | 0.00042 | 0.04274  |
